# Supplementary material for: Unbiased discovery of autoantibodies associated with severe COVID-19 via genome-scale self-assembled DNA-barcoded protein libraries
Source: Springer Nature journal article supplement (doi:10.1038/s41551-022-00925-y), 2022-08-19
Supplement: 41551_2022_925_MOESM1_ESM.pdf [file 41551_2022_925_MOESM1_ESM.pdf]

---

**Supplementary information**

---

**Unbiased discovery of autoantibodies associated with severe COVID-19 via genome-scale self-assembled DNA-barcoded protein libraries**

---

In the format provided by the authors and unedited

## **Contents**

Supplementary Figs. 1 to 8

Supplementary Tables 1 to 3

Caption for Supplementary Data File 1

Captions for Source Data 1 – 6

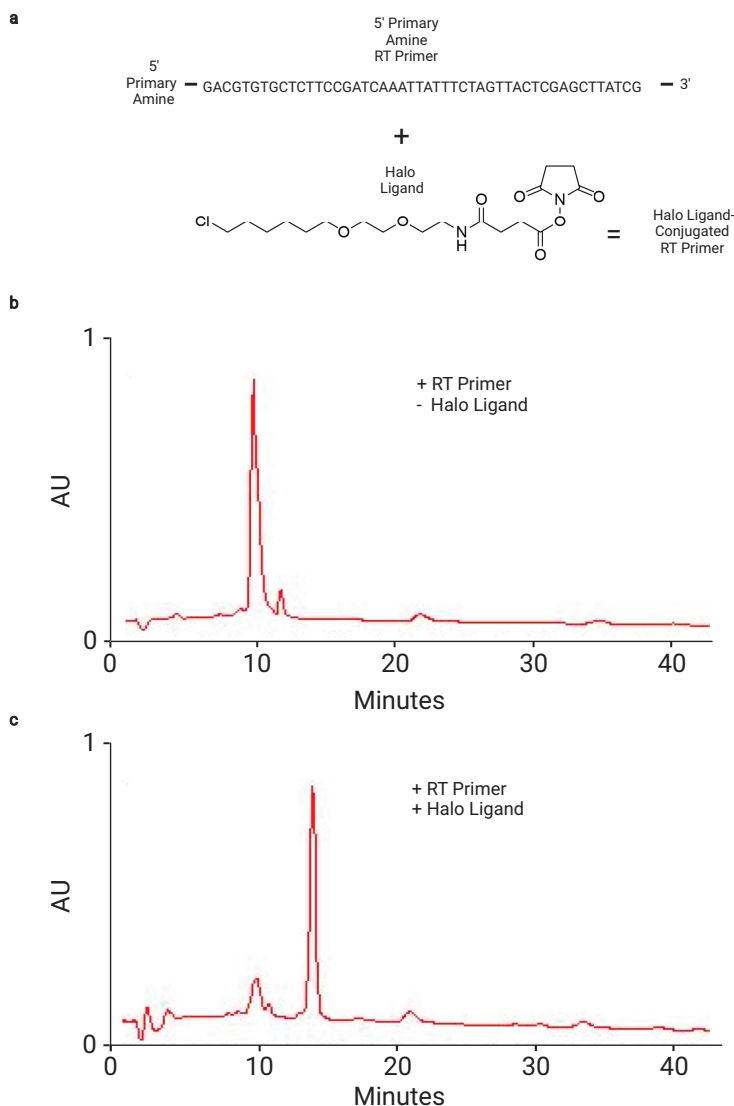

**Supplementary Fig. 1: HaloLigand conjugation to the reverse transcription primer.** **a**, Above is the oligonucleotide reverse transcription (RT) primer sequence modified with a 5' primary amine. Below is the HaloLigand with a reactive succinimidyl ester group, separated by one ethylene glycol moiety (O2). The succinimidyl ester reacts with the primary amine to form an amide-bond between the RT primer and the HaloLigand, resulting in the HaloLigand-conjugated RT primer. **b**, HPLC chromatogram of the RT primer without the HaloLigand modification. **c**, HPLC chromatogram of the RT primer with the HaloLigand modification after purification. The conjugated product elutes later due to increased hydrophobicity conferred by the modification.

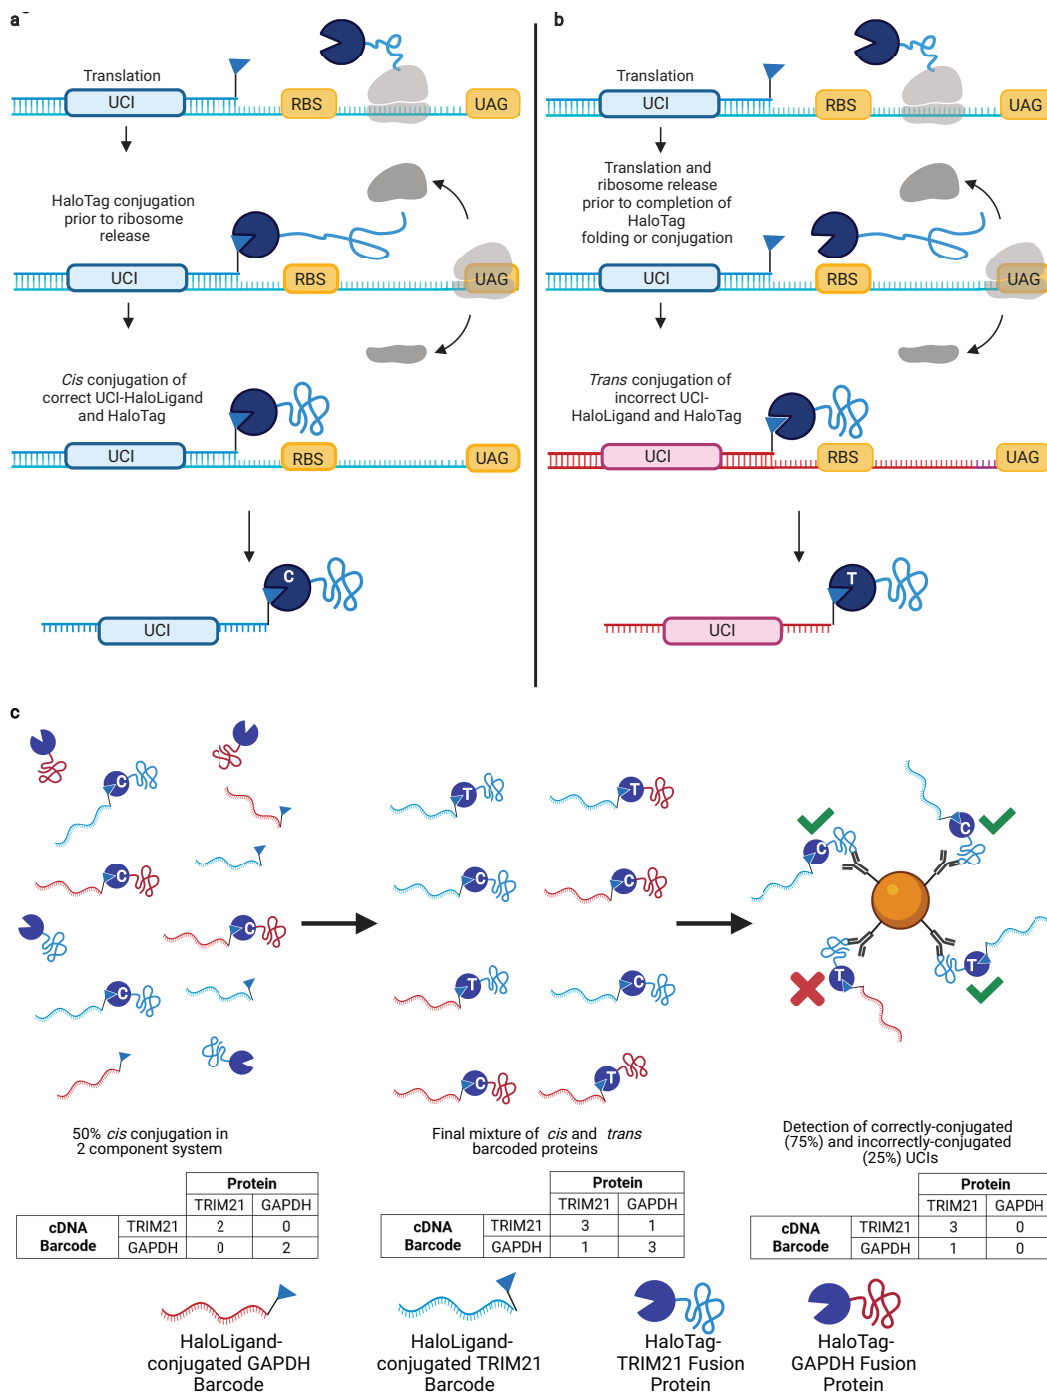

**Supplementary Fig. 2: *Cis* versus *trans* UCI-ORF associations.** Schematic of *cis* product **a**, versus *trans* side product **b**, UCI-ORF conjugation during translation of a MIPSAs IVT-RNA library. **c**, Left panel: 50% *cis* conjugates (“C”) composed of the correct protein-UCI associations (e.g. blue UCI with blue protein). Middle panel: unconjugated proteins then randomly associates with unconjugated UCIs in *trans* (“T”). Right panel: the ratio of correctly to incorrectly IPed UCIs in this two-species experiment is 3:1 (75%:25%), similar to experimental observations (**Fig. 2a**).

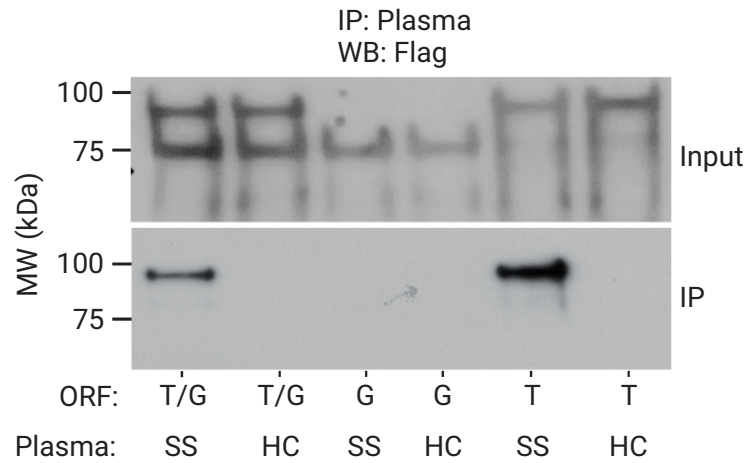

**Supplementary Fig. 3: Two-plex translation and IP of TRIM21 and GAPDH.** *TRIM21* (T) and *GAPDH* (G) IVT-RNA-cDNA were translated either separately or together and then subjected to IP with healthy control (HC) or Sjogren's Syndrome (SS) plasma. Analysis was by immunoblotting with the M2 antibody that recognizes the common FLAG epitope tag included in linker between the HaloTag and the protein.

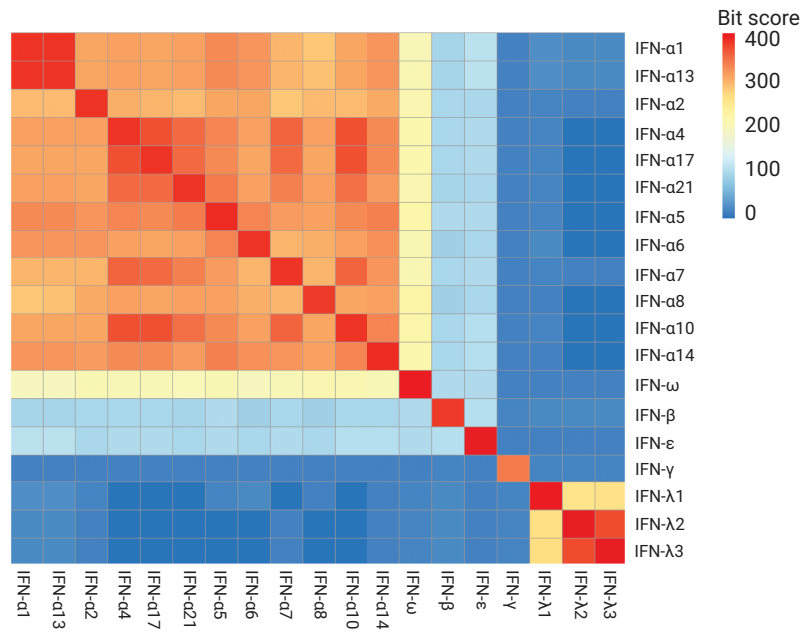

**Supplementary Fig. 4: Sequence homology of interferons.** Pairwise blastp alignment bitscore matrix for all interferon (IFN) proteins shown in **Fig. 5d**.

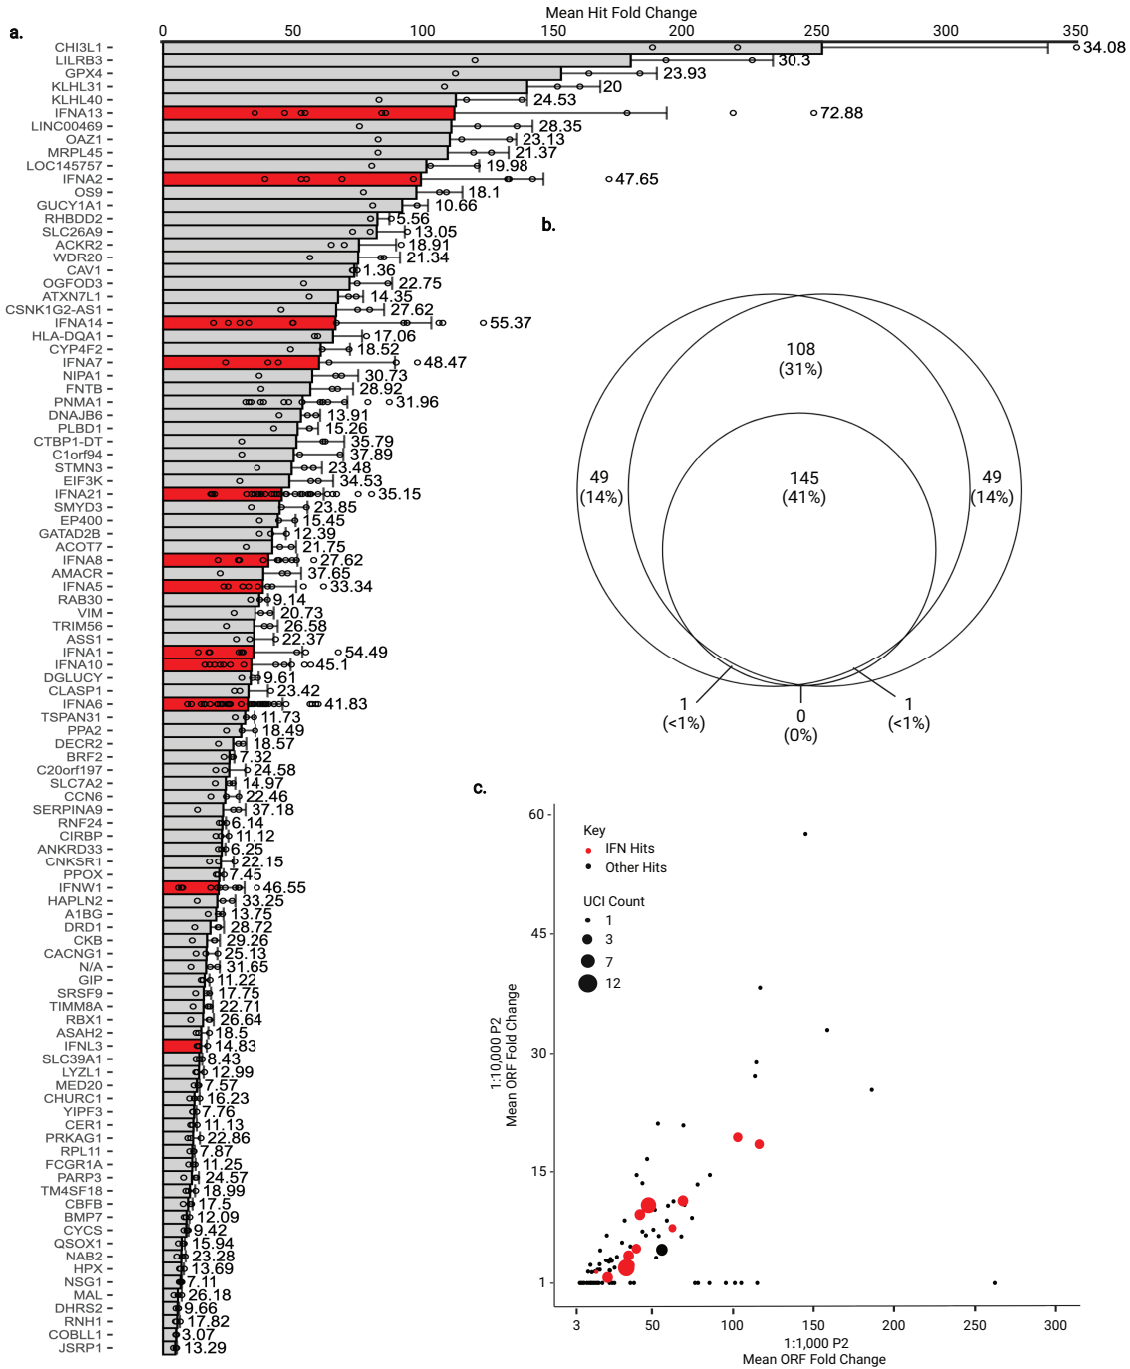

**Supplementary Fig. 5: Reproducibility and linearity of MIPSAs detection of patient P2's autoantibodies.** **a**, Mean and standard deviation of the 100 ORF fold changes for all consistently reactive monospecific UCIs (fold change > 3 in all 3 replicates). The values to the right of the error bars are the coefficients of variation. **b**, Numbers of overlapping reactive monospecific UCIs over three independent MIPSAs analyses of P2 plasma. Areas are proportional to numbers of hits. **c**, Mean ORF fold changes for P2 plasma, compared to P2 plasma diluted 10-fold into a background of a healthy control plasma. Dot sizes depict the numbers of reactive UCIs corresponding to each ORF.

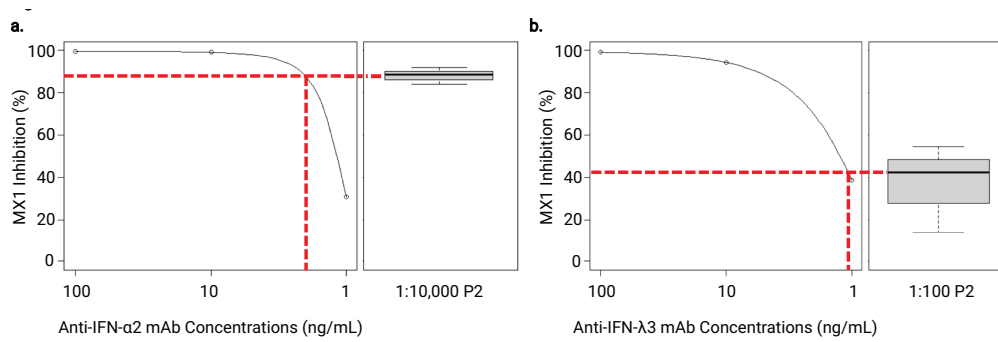

**Supplementary Fig. 6: Titration-based estimate of patient P2's interferon autoantibody levels.** Mouse monoclonal blocking antibodies were used at different concentrations in the cell-based IFN neutralization assay: **a**, IFN- $\alpha$ 2 and **b**, IFN- $\lambda$ 3. Neutralization curves were fit and used to estimate patient P2's corresponding interferon autoantibody levels. The plasma dilutions shown were selected to be within the dynamic range of the assay; neutralizing activity of P2 plasma at the dilution shown was assayed in technical triplicate. For the 1:10,000 P2 IFN- $\alpha$ 2 neutralization test, the median +/- standard deviation of the percent inhibition of *MX1* induction is 88.69 +/-3.24, respectively. For the 1:100 P2 IFN- $\lambda$ 3 neutralization test, the median +/- standard deviation of the percent inhibition of *MX1* induction is 42.58 +/-17.16, respectively.





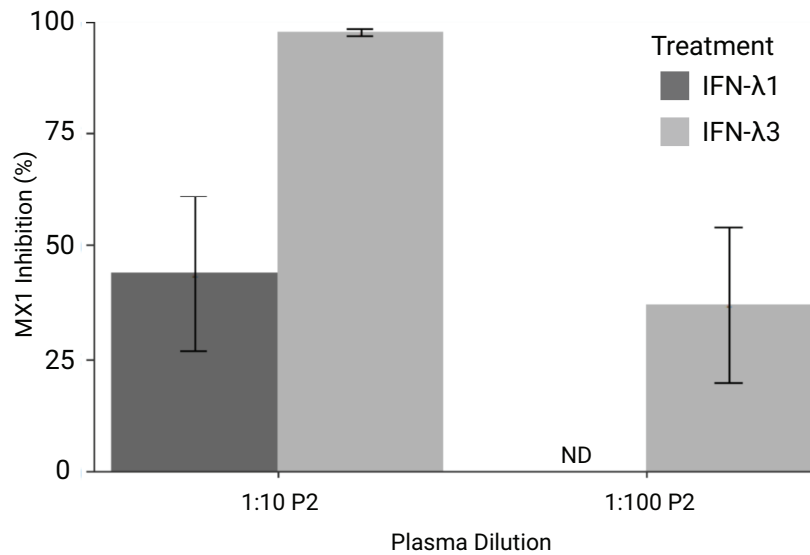

**Supplementary Fig. 8: IFN-λ3 autoantibodies do not efficiently neutralize IFN-λ1.** The IFN-λ3 neutralizing activity of patient P2's plasma was compared to its IFN-λ1 neutralizing activity. Neutralization of IFN-λ3 was complete and partial at 1:10 and 1:100 dilutions, respectively. Neutralization of IFN-λ1 was partial and not detected at 1:10 and 1:100 dilutions, respectively. Mean +/- standard deviation of percent inhibition of MX1 induction by IFN-λ3 were 97.02 +/-0.77 for 1:10 P2 and 36.94 +/-17.16 for 1:100 P2. Mean +/- standard deviation of percent inhibition of MX1 induction by IFN-λ1 were 43.81 +/-17.07 for 1:10 P2 and 0 (not detected) for 1:100 P2.

| Study Population         |                 |    |                  |             |       |       |       |
|--------------------------|-----------------|----|------------------|-------------|-------|-------|-------|
| Group                    |                 | #  | Age              | Sex         | Black | White | Other |
| <b>Severe COVID-19</b>   | Died            | 17 | 67 (27,87)       | F: 8, M: 9  | 9     | 4     | 4     |
|                          | Ventilated      | 13 | 67 (27,82)       | F: 9, M: 4  | 4     | 4     | 5     |
|                          | Got O2          | 22 | 52 (27,82)       | F: 9, M: 13 | 8     | 8     | 6     |
|                          | No O2           | 3  | 46 (22,49)       | F: 0, M: 3  | 0     | 3     | 0     |
| <b>COVID-19 Controls</b> | Mild/Mod        | 10 | 35 (19,55)       | F: 6, M: 4  | 0     | 8     | 2     |
|                          | Healthy Control | 10 | 41.5 (22,66)     | F: 3, M: 7  | 3     | 5     | 2     |
| <b>Myositis</b>          | Inclusion Body  | 10 | 53.9 (43.6,60.6) | F: 7, M: 3  | 1     | 7     | 2     |
|                          | Healthy Control | 10 | 36.5 (20,60)     | F: 5, M: 5  | 2     | 8     | 0     |

**Supplementary Table 1: Severe COVID-19 patients and control study participants.** Individuals' ages were provided to investigators as intervals to protect identities of study participants.

| Symbol    | Gene_name                                                   | AAtlas | #Severe | #Controls | #Reactive_UCIs | hits_FCs          | Cluster_ID |
|-----------|-------------------------------------------------------------|--------|---------|-----------|----------------|-------------------|------------|
| ASTL      | astacin like metalloendopeptidase                           | no     | 2       | 1         | 2              | 5.7, (3.8,7.5)    | 1          |
| BEND7     | BEN domain containing 7                                     | no     | 6       | 1         | 7              | 5.5, (3.2,16.1)   | 2          |
| BLVRA     | biliverdin reductase A                                      | no     | 1       | 0         | 3              | 17.9, (17.9,17.9) | 1          |
| BMPR2     | bone morphogenetic protein receptor type 2                  | yes    | 3       | 0         | 2              | 3.5, (3.2,4.0)    | 1          |
| C1orf94   | chromosome 1 open reading frame 94                          | no     | 12      | 0         | 8              | 5.2, (3.0,15.4)   | 3          |
| C3orf18   | chromosome 3 open reading frame 18                          | no     | 1       | 0         | 2              | 3.3, (3.3,3.3)    | 1          |
| CALHM1    | calcium homeostasis modulator 1                             | no     | 3       | 1         | 2              | 3.9, (3.3,4.4)    | 1          |
| CAV2      | caveolin 2                                                  | no     | 9       | 0         | 2              | 3.7, (3.1,5.0)    | 4          |
| CCDC106   | coiled-coil domain containing 106                           | no     | 4       | 0         | 10             | 4.4, (3.1,7.2)    | 2          |
| CCDC146   | coiled-coil domain containing 146                           | no     | 5       | 0         | 3              | 3.6, (3.1,4.7)    | 1          |
| CD2BP2    | CD2 cytoplasmic tail binding protein 2                      | no     | 2       | 0         | 3              | 14.9, (5.1,24.8)  | 5          |
| CDC73     | cell division cycle 73                                      | no     | 1       | 0         | 2              | 4.1, (4.1,4.1)    | 1          |
| CHMP7     | charged multivesicular body protein 7                       | no     | 10      | 1         | 3              | 3.6, (3.1,4.7)    | 4          |
| CTAG2     | cancer/testis antigen 2                                     | no     | 3       | 0         | 6              | 5.2, (3.0,9.4)    | 1          |
| CYP2S1    | cytochrome P450 family 2 subfamily S member 1               | no     | 2       | 0         | 3              | 4.1, (3.2,5.0)    | 1          |
| DNAJC17   | DnaJ heat shock protein family (Hsp40) member C17           | no     | 4       | 0         | 2              | 3.2, (3.0,3.6)    | 2          |
| DOLPP1    | dolichylidiphosphatase 1                                    | no     | 3       | 0         | 3              | 4.7, (3.9,5.1)    | 1          |
| EHD1      | EH domain containing 1                                      | no     | 2       | 0         | 14             | 33.4, (3.6,63.2)  | 1          |
| EHD2      | EH domain containing 2                                      | no     | 2       | 0         | 4              | 4.3, (3.0,5.6)    | 1          |
| ELOA2     | elongin A2                                                  | no     | 9       | 0         | 2              | 3.5, (3.0,4.9)    | 4          |
| EXD1      | exonuclease 3'-5' domain containing 1                       | no     | 1       | 0         | 2              | 7.2, (7.2,7.2)    | 5          |
| EXOC4     | exocyst complex component 4                                 | no     | 17      | 0         | 7              | 3.9, (3.0,4.9)    | 4          |
| FAM185A   | family with sequence similarity 185 member A                | no     | 4       | 1         | 2              | 3.4, (3.2,3.6)    | 1          |
| FAM32A    | family with sequence similarity 32 member A                 | no     | 4       | 0         | 2              | 3.6, (3.2,4.0)    | 2          |
| FBXL19    | F-box and leucine rich repeat protein 19                    | no     | 2       | 0         | 3              | 7.0, (3.0,11.0)   | 1          |
| FDFT1     | farnesyl-diphosphate farnesyltransferase 1                  | no     | 1       | 0         | 2              | 46.8, (46.8,46.8) | 1          |
| FRG1      | FSHD region gene 1                                          | no     | 5       | 0         | 3              | 3.6, (3.2,4.3)    | 1          |
| FUT9      | fucosyltransferase 9                                        | no     | 2       | 1         | 3              | 3.9, (3.5,4.3)    | 1          |
| GATA2     | GATA binding protein 2                                      | no     | 5       | 0         | 2              | 3.6, (3.0,4.3)    | 4          |
| GIMAP8    | GTPase, IMAP family member 8                                | no     | 1       | 0         | 2              | 4.7, (4.7,4.7)    | 1          |
| HNH4A     | hepatocyte nuclear factor 4 alpha                           | no     | 1       | 0         | 2              | 11.7, (11.7,11.7) | 1          |
| HNRNPUL1  | heterogeneous nuclear ribonucleoprotein U like 1            | no     | 3       | 0         | 4              | 5.7, (3.6,8.6)    | 1          |
| HPGD      | 15-hydroxyprostaglandin dehydrogenase                       | no     | 1       | 0         | 4              | 6.0, (6.0,6.0)    | 1          |
| IFNA10    | interferon alpha 10                                         | no     | 2       | 0         | 5              | 18.8, (16.8,20.7) | 2          |
| IFNA13    | interferon alpha 13                                         | no     | 4       | 0         | 2              | 22.5, (4.6,51.4)  | 2          |
| IFNA14    | interferon alpha 14                                         | no     | 3       | 0         | 2              | 19.3, (3.2,44.2)  | 2          |
| IFNA2     | interferon alpha 2                                          | yes    | 2       | 0         | 3              | 42.5, (25.2,59.8) | 2          |
| IFNA21    | interferon alpha 21                                         | no     | 2       | 0         | 10             | 25.1, (14.9,35.3) | 2          |
| IFNA5     | interferon alpha 5                                          | no     | 2       | 0         | 3              | 14.6, (14.6,14.7) | 2          |
| IFNA6     | interferon alpha 6                                          | no     | 4       | 1         | 12             | 9.4, (3.3,21.8)   | 2          |
| IFNA8     | interferon alpha 8                                          | no     | 7       | 0         | 5              | 9.7, (3.1,36.4)   | 2          |
| IFNL3     | interferon lambda 3                                         | no     | 3       | 1         | 5              | 5.5, (4.2,7.6)    | 1          |
| IFNW1     | interferon omega 1                                          | no     | 2       | 0         | 5              | 29.6, (10.6,48.5) | 2          |
| IKZF3     | IKAROS family zinc finger 3                                 | no     | 2       | 0         | 4              | 13.8, (3.3,24.2)  | 1          |
| KCNJ12    | potassium inwardly rectifying channel subfamily J member 12 | no     | 1       | 0         | 2              | 3.1, (3.1,3.1)    | 1          |
| KCNJ14    | potassium inwardly rectifying channel subfamily J member 14 | no     | 2       | 0         | 3              | 3.9, (3.2,4.6)    | 1          |
| KLHL31    | kelch like family member 31                                 | no     | 1       | 0         | 2              | 11.3, (11.3,11.3) | 2          |
| KLHL40    | kelch like family member 40                                 | no     | 1       | 0         | 4              | 8.4, (8.4,8.4)    | 2          |
| LALBA     | lactalbumin alpha                                           | no     | 1       | 0         | 2              | 3.9, (3.9,3.9)    | 1          |
| LINC01547 | long intergenic non-protein coding RNA 1547                 | no     | 2       | 0         | 6              | 19.3, (3.4,35.1)  | 1          |
| MAGEE1    | MAGE family member E1                                       | no     | 1       | 0         | 3              | 17.9, (17.9,17.9) | 1          |

**Supplementary Table 2: Proteins reactive in severe COVID-19 patients.** Symbol, gene symbol; AAtlas, is protein listed in AAtlas 1.0?; #Severe, number of severe COVID-19 patients with reactivity to at least one UCI; #Controls, number of control donors (healthy or mild-moderate COVID-19) with reactivity to at least one UCI; #Reactive\_UCIs, number of reactive UCIs associated with given ORF; Hits\_FCs, mean and range (minimum to maximum) of per-ORF maximum hits fold-change observed among the patients with the reactivity; Cluster\_ID, antigen cluster defined by **Fig 4b**.

| Symbol   | Gene_name                                                     | AAGAtlas | #Severe | #Controls | #Reactive UCIs | hits_FCs          | Cluster_ID |
|----------|---------------------------------------------------------------|----------|---------|-----------|----------------|-------------------|------------|
| MAX      | MYC associated factor X                                       | no       | 7       | 0         | 10             | 13.0, (3.1,30.9)  | 3          |
| MBD3L1   | methyl-CpG binding domain protein 3 like 1                    | no       | 2       | 0         | 5              | 8.1, (4.1,12.2)   | 1          |
| MKX      | mohawk homeobox                                               | no       | 6       | 1         | 3              | 3.8, (3.1,4.8)    | 4          |
| MPPED2   | metallophosphoesterase domain containing 2                    | no       | 5       | 0         | 3              | 5.2, (3.1,11.7)   | 1          |
| NACC1    | nucleus accumbens associated 1                                | no       | 2       | 0         | 12             | 74.9, (74.7,75.2) | 5          |
| NAPSA    | napsin A aspartic peptidase                                   | no       | 3       | 1         | 3              | 4.1, (3.1,4.7)    | 1          |
| NBPF1    | NBPF member 1                                                 | no       | 1       | 0         | 2              | 6.9, (6.9,6.9)    | 1          |
| NBPF15   | NBPF member 15                                                | no       | 1       | 0         | 2              | 3.5, (3.5,3.5)    | 1          |
| NOXO1    | NADPH oxidase organizer 1                                     | no       | 3       | 0         | 6              | 3.9, (3.0,4.8)    | 1          |
| NT5C1A   | 5'-nucleotidase, cytosolic 1A                                 | no       | 3       | 1         | 2              | 26.9, (7.2,59.9)  | 5          |
| NUP62    | nucleoporin 62                                                | no       | 1       | 0         | 7              | 8.4, (8.4,8.4)    | 1          |
| NVL      | nuclear VCP like                                              | no       | 1       | 0         | 2              | 21.6, (21.6,21.6) | 1          |
| OLFM4    | olfactomedin 4                                                | yes      | 5       | 1         | 3              | 12.9, (4.4,29.8)  | 5          |
| PIMREG   | PICALM interacting mitotic regulator                          | no       | 4       | 1         | 4              | 3.8, (3.5,4.1)    | 1          |
| PLEKHF1  | pleckstrin homology and FYVE domain containing 1              | no       | 2       | 0         | 3              | 3.3, (3.1,3.5)    | 1          |
| PML      | PML nuclear body scaffold                                     | no       | 1       | 0         | 4              | 29.7, (29.7,29.7) | 1          |
| PNMA1    | PNMA family member 1                                          | yes      | 1       | 0         | 3              | 6.4, (6.4,6.4)    | 2          |
| PNMA5    | PNMA family member 5                                          | no       | 2       | 0         | 5              | 5.7, (4.0,7.4)    | 2          |
| POLDIP3  | DNA polymerase delta interacting protein 3                    | no       | 5       | 0         | 3              | 3.3, (3.1,3.7)    | 4          |
| POMP     | proteasome maturation protein                                 | no       | 1       | 0         | 2              | 3.2, (3.2,3.2)    | 1          |
| POU6F1   | POU class 6 homeobox 1                                        | no       | 1       | 0         | 3              | 12.0, (12.0,12.0) | 1          |
| PQBP1    | polyglutamine binding protein 1                               | no       | 5       | 0         | 2              | 3.2, (3.0,3.5)    | 5          |
| PRKAR2B  | protein kinase cAMP-dependent type II regulatory subunit beta | no       | 1       | 0         | 3              | 7.3, (7.3,7.3)    | 1          |
| PXDNL    | peroxidasin like                                              | no       | 4       | 0         | 4              | 3.5, (3.1,3.9)    | 2          |
| RBM17    | RNA binding motif protein 17                                  | no       | 1       | 0         | 3              | 23.6, (23.6,23.6) | 1          |
| RCAN3    | RCAN family member 3                                          | no       | 1       | 0         | 5              | 5.3, (5.3,5.3)    | 1          |
| RPL13AP3 | ribosomal protein L13a pseudogene 3                           | no       | 4       | 1         | 5              | 3.4, (3.1,3.7)    | 1          |
| RPL15    | ribosomal protein L15                                         | no       | 11      | 1         | 6              | 3.4, (3.1,3.9)    | 3          |
| RPP14    | ribonuclease P/MRP subunit p14                                | no       | 1       | 0         | 6              | 35.9, (35.9,35.9) | 1          |
| RPP30    | ribonuclease P/MRP subunit p30                                | no       | 1       | 0         | 4              | 46.1, (46.1,46.1) | 1          |
| RUFY4    | RUN and FYVE domain containing 4                              | no       | 1       | 0         | 4              | 16.3, (16.3,16.3) | 1          |
| SNRPA1   | small nuclear ribonucleoprotein polypeptide A'                | no       | 1       | 0         | 2              | 5.3, (5.3,5.3)    | 1          |
| SPEF1    | sperm flagellar 1                                             | no       | 2       | 0         | 5              | 5.9, (3.2,8.5)    | 1          |
| SPRR1B   | small proline rich protein 1B                                 | no       | 1       | 0         | 4              | 7.5, (7.5,7.5)    | 1          |
| SSNA1    | SS nuclear autoantigen 1                                      | yes      | 1       | 0         | 5              | 12.2, (12.2,12.2) | 2          |
| STPG3    | sperm-tail PG-rich repeat containing 3                        | no       | 1       | 0         | 2              | 3.6, (3.6,3.6)    | 1          |
| SYT2     | synaptotagmin 2                                               | no       | 6       | 1         | 4              | 3.6, (3.2,4.5)    | 5          |
| TBC1D10B | TBC1 domain family member 10B                                 | no       | 3       | 1         | 2              | 3.4, (3.1,4.1)    | 1          |
| TFAP4    | transcription factor AP-4                                     | no       | 1       | 0         | 5              | 3.7, (3.7,3.7)    | 1          |
| TMPO     | thymopoietin                                                  | no       | 2       | 0         | 5              | 15.7, (3.7,27.7)  | 1          |
| TNFSF14  | TNF superfamily member 14                                     | no       | 1       | 0         | 2              | 3.7, (3.7,3.7)    | 1          |
| TOX4     | TOX high mobility group box family member 4                   | no       | 1       | 0         | 3              | 9.9, (9.9,9.9)    | 1          |
| TRAI     | TRAF interacting protein                                      | no       | 2       | 0         | 3              | 4.7, (3.4,6.0)    | 1          |
| VAV1     | vav guanine nucleotide exchange factor 1                      | no       | 1       | 0         | 4              | 10.2, (10.2,10.2) | 1          |
| ZBTB18   | zinc finger and BTB domain containing 18                      | no       | 1       | 0         | 2              | 3.3, (3.3,3.3)    | 1          |
| ZFP2     | ZFP2 zinc finger protein                                      | no       | 2       | 1         | 3              | 4.9, (3.1,6.7)    | 1          |
| ZMAT2    | zinc finger matrin-type 2                                     | no       | 6       | 0         | 5              | 3.6, (3.1,4.1)    | 2          |
| ZNF146   | zinc finger protein 146                                       | no       | 2       | 0         | 8              | 16.4, (3.1,29.7)  | 1          |
| ZNF232   | zinc finger protein 232                                       | no       | 2       | 1         | 4              | 4.6, (3.5,5.8)    | 1          |
| ZNF678   | zinc finger protein 678                                       | no       | 3       | 1         | 2              | 6.6, (3.4,12.8)   | 1          |
| ZSCAN32  | zinc finger and SCAN domain containing 32                     | no       | 1       | 0         | 2              | 11.3, (11.3,11.3) | 1          |
| ZSCAN5A  | zinc finger and SCAN domain containing 5A                     | no       | 3       | 0         | 4              | 4.0, (3.2,5.3)    | 1          |

**Supplementary Table 2. (continued)**

| <b>Names</b>          | <b>Sequences</b>                                               |
|-----------------------|----------------------------------------------------------------|
| T7-Pep2_PCR1_F        | 5'-ATAAAGGTGAGGGTAATGTC-3'                                     |
| Nextera Index 1       | 5'-CAAGCAGAAGACGGCATAACGAGAT[i7]GTCTCGTGGGCTCGG-3'             |
| PhIP_PCR2_F           | 5'-AATGATACGGCGACCACCGAGATCTACAC-[i5]-GGAGCTGTCTATTCCAGTC-3'   |
| P7.2                  | 5'-CAAGCAGAAGACGGCATAACGA-3'                                   |
| T7-Pep2_PCR1_R+ad_min | 5'-CTGGAGTTCAGACGTGTGCTCTTCCGATCAGTTACTCGAGCTTATCGT-3'         |
| PhIP_PCR2_R           | 5'-CAAGCAGAAGACGGCATAACGAGAT-[i7]-GTGACTGGAGTTCAGACGTGTGCTC-3' |
| T7-Pep2.2_SP_subA     | 5'-CTCGGGGATCCAGGAATCCGCTGCGT-3'                               |
| MISEQ_MIPSA_R2        | 5'-ATGACGACAAGCCATGGTCCAATCAAACAAGTTTGTACAAAAAAGTTGGC-3'       |
| MIPSA_i5_NextSeq_SP   | 5'-GGATCCCCGAGACTGGAATACGACAGCTCC-3'                           |
| Standard_i7_SP        | 5'-GATCGGAAGAGCACACGTCTGAACTCCAGTCAC-3'                        |
| HL-32_ad              | HL-GACGTGTGCTCTTCCGATCAAATTATTTCTAGGTTACTCGAGCTTATCG-3'        |
| MX1_Forward           | 5'-ACCACAGAGGCTCTCAGCAT-3'                                     |
| MX1_Reverse           | 5'-CTCAGCTGGTCCTGGATCTC-3'                                     |
| GAPDH_Forward         | 5'-GAGTCAACGGATTTGGTCGT-3'                                     |
| GAPDH_Reverse         | 5'-TTGATTTTGGAGGGATCTCG-3'                                     |
| BT2_F                 | 5'-GTCAGAGTGACACACTGT-3'                                       |
| BT2_R                 | 5'-AGAGTGACAGTCACAGTG-3'                                       |
| BG4_F                 | 5'-CACTGACTGTGTGAGTGT-3'                                       |
| BG4_R                 | 5'-TGAGACACAGTGAGTCAC-3'                                       |
| NT5C1A_F              | 5'-CTCACAGACAGACGTCA-3'                                        |
| NT5C1A_R              | 5'-TGTCAGTCAGTGAGTGTG-3'                                       |

**Supplementary Table 3: Primer sequences used in this study.**

**Supplementary Data File 1: Hits fold-change MIPS data matrix for UCIs of reactive proteins in severe COVID-19 patients.** Proteins were included if they had at least two reactive UCIs in at least one severe patient and were not reactive in more than one control (healthy or mild/moderate convalescent plasma). Proteins were not included if they were reactive in a single severe patient and a single control. Each row corresponds to a single UCI, organized by protein in alphabetical order (gene symbol provided to left of underscore). Each column is an individual COVID-19 patient. If the UCI read counts were not significantly enriched versus the mock IPs, it is reported as “1”. If the UCI read counts were significantly enriched versus mock IPs, the fold-change estimate (from EdgeR) is provided.

**Source Data 1: Unprocessed western blot of Figure 1E.**

**Source Data 2: Unprocessed western blot of top panel in Figure 1F.**

**Source Data 3: Unprocessed western blot of middle panel in Figure 1F.**

**Source Data 4: Unprocessed western blot of bottom panel in Figure 1F.**

**Source Data 5: Unprocessed western blot of top panel in Figure S3.**

**Source Data 6: Unprocessed western blot of bottom panel in Figure S3.**
