# Supplementary material for: Unbiased discovery of autoantibodies associated with severe COVID-19 via genome-scale self-assembled DNA-barcoded protein libraries
Source: Springer Nature journal article supplement (doi:10.1038/s41551-022-00925-y), 2022-08-19

Source Data 1: Unprocessed western blot of Figure 1E.

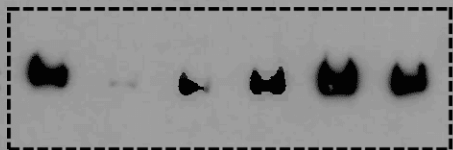

PI 25.10

06

.221

Source Data 2: Unprocessed western blot of top panel in Figure 1F.

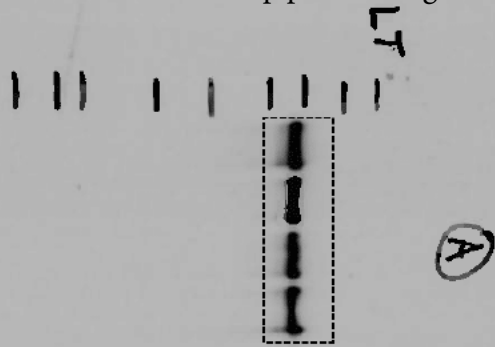

(C)

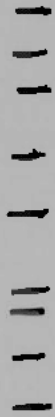

(B)

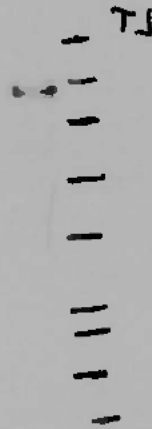

01/25/19

Source Data 3: Unprocessed western blot of middle panel in Figure 1F  
2 min.

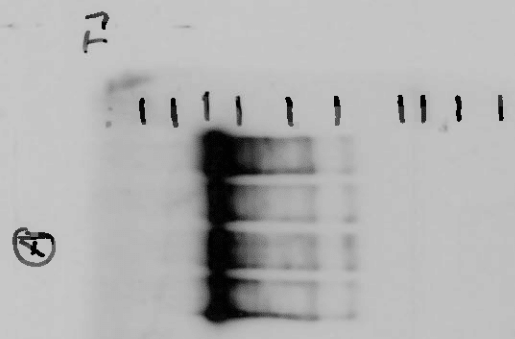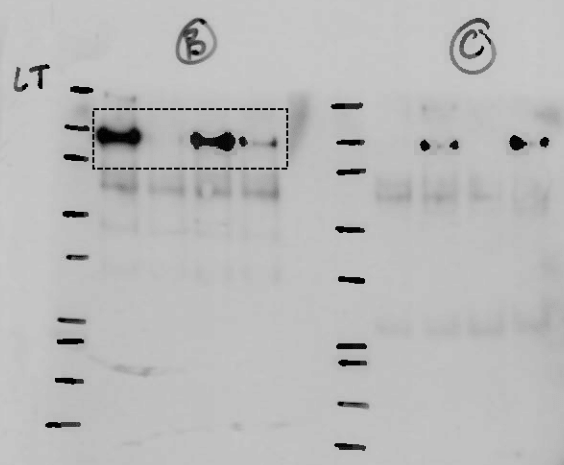

01/25/19

15 min.

Source Data 4: Unprocessed western blot of bottom panel in Figure 1F

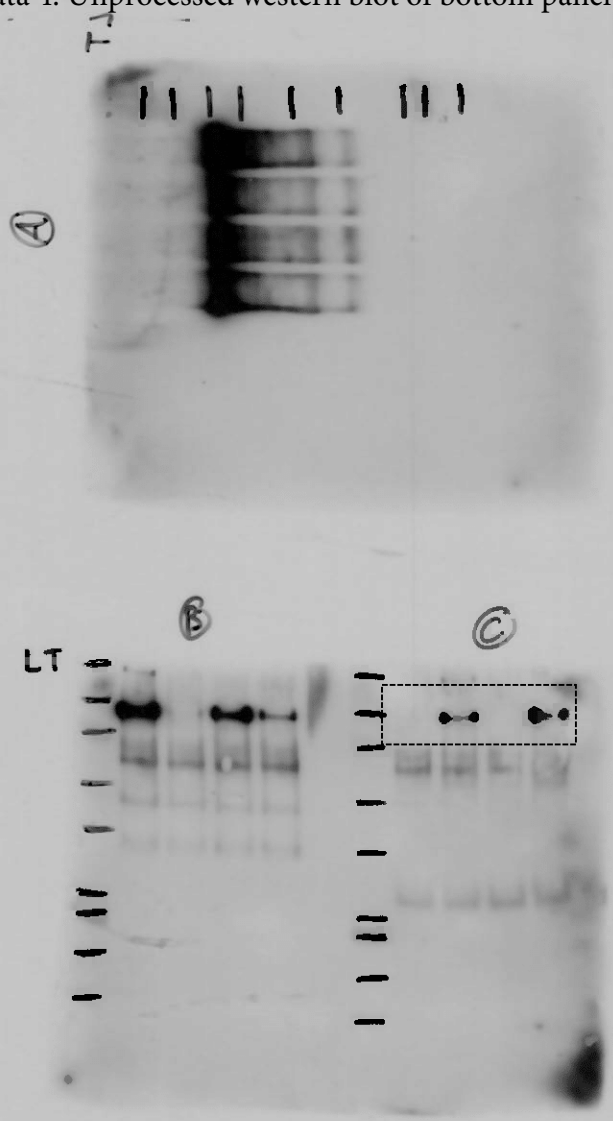

Supplement: 41551_2022_925_MOESM4_ESM.pdf [file 41551_2022_925_MOESM4_ESM.pdf]
